# Supplementary material
Source: PubMed Central journal article supplement (PMC3352277)
Supplement: supp_157.11.3221_mic053579_Table_S1.pdf [file supp_157.11.3221_mic053579_Table_S1.pdf]

## ***Bacillus subtilis* Fur represses one of two paralogous haem-degrading monooxygenases**

By: Ahmed Gaballa and John D. Helmann

### **SUPPLEMENTARY TABLE**

**Supplementary Table S1.** Oligonucleotides used in this study

| <b>Primer</b> | <b>Sequence (5'–3')</b>                             | <b>Purpose</b>                          |
|---------------|-----------------------------------------------------|-----------------------------------------|
| yetG-lacZF    | GCGAAGCTTATGTCGAGGACCAGCAGAA                        | Construction of <i>hmoA-lacZ</i> fusion |
| yetG-lacZR    | GCGGGATCCGTCATTTTTCTCAACTGTA                        |                                         |
| yetG-up-F     | CGATTTACCTATGTCTGGTTA                               | Construction of <i>hmoA</i> mutant      |
| yetG-up-R     | CGTTACGTTATTAGCGAGCCAGTCGACTTTATCTG<br>CAAAGCCTTC   |                                         |
| yetG-down-F   | CAATAAACCCCTTGCCCTCGCTACGCATGTACCAT<br>GTACGTGCTG   |                                         |
| yetG-down-R   | TGGTCTGCGGTTTAGGCAT                                 |                                         |
| yetG-F-pet    | GAGTGAGACA <sub>t</sub> ATGTTTGTACAGTTGAGAAA        | Overexpression of HmoA                  |
| yetG-R-pet    | GCGGGATCCTTTTTATTGATTGTATGTCCCTTG                   |                                         |
| yetG-GPS-1    | ATTGCTTCCAGTGATCCTCTGA                              | 5'RACE of <i>hmoA</i>                   |
| yetG-GPS-2    | GCGCTGAAACGTTCTATGACTT                              |                                         |
| yetG-R6N-F    | AACAAAATGACGGTTAAAGAAGGCT                           | Construction of <i>hmoA</i> R6N mutant  |
| yetG-R6N-R    | AGCCTTCTTTAACCGTCATTTTGTTCAACTGTACA<br>AACATTTGTCTC |                                         |
| yetG-R6A-F    | GCAAAAATGACGGTTAAAGAAGGCT                           | Construction of <i>hmoA</i> R6A mutant  |
| yetG-R6A-R    | AGCCTTCTTTAACCGTCATTTTGCCA ACTGTACA<br>AACATTTGTCTC |                                         |
| YhgC-pet16-F  | GTGGCTCATATGAAGGTTTATATTACGTATGGGA<br>CAGCCGATT     | Overexpression of HmoB                  |

| <b>Primer</b>               | <b>Sequence (5'–3')</b>                            | <b>Purpose</b>                          |
|-----------------------------|----------------------------------------------------|-----------------------------------------|
| YhgC-pet16-R                | GCGGGATCCGGCAGCTATTCGACAGCGA                       |                                         |
| YhgC-up-F                   | ATCAGGGTGCAAAATTGGAGA                              | Construction of <i>hmoB</i> mutant      |
| YhgC-up-R                   | GAGAACAACCTGCACCATTGCAAGAAATCGGCT<br>GTCCCATATGTAA |                                         |
| YhgC-down-F                 | GGGATCAACTTTGGGAGAGAGTTCGGCCTTCCTA<br>TGTCACCAC    |                                         |
| YhgC-down-R                 | AGCGACACCCGGAGAAGG                                 |                                         |
| YhgC-lacZ-F                 | GAATAAGCTTTTTTTCATCTATGAC                          | Construction of <i>hmoA-lacZ</i> fusion |
| YhgC-down-F-<br><i>SalI</i> | GCGGTCGACTTCTTTTGTTTTTCTTAGAAAT                    |                                         |
| yhgC-N70R-F                 | AGAAATATTGCCGTTACTCAGGAA                           | Construction of <i>hmoB</i> N70R mutant |
| yhgC-N70R-R                 | TTCCTGAGTAACGGCAATATTTCTCAATACTGCA<br>AAACCGGGATG  |                                         |
| yhgC-N70A-F                 | GCCAATATTGCCGTTACTCAGGAA                           | Construction of <i>hmoB</i> N70A mutant |
| yhgC-N70A-R                 | TTCCTGAGTAACGGCAATATTGGCCAATACTGCA<br>AAACCGGGATG  |                                         |
