# Supplementary material
Source: PubMed Central journal article supplement (PMC3352277)
Supplement: supp_157.11.3221_mic053579figS1.pdf [file supp_157.11.3221_mic053579figS1.pdf]

***Bacillus subtilis* Fur represses one of two paralogous haem-degrading monooxygenases**

**By:** Ahmed Gaballa and John D. Helmann

**SUPPLEMENTARY FIGURE**

Supplementary Fig. S1

Percentage identity

|                                            | HmoA <i>B. subtilis</i> | HmoB <i>B. subtilis</i> | ISDG <i>S. aureus</i> | ISDI <i>S. aureus</i> | BA2987 <i>B. anthracis</i> | IsdG <i>B. anthracis</i> | YetG <i>B. amyloliquefaciens</i> | Bcer98_2029 <i>B. cereus</i> | BBR47_55400 <i>B. brevis</i> | Bsph_4360 <i>Lysinibacillus sphaericus</i> | IsdG <i>Lysinibacillus sphaericus</i> | ABC1946 <i>B. clausii</i> | IsdG <i>B. clausii</i> | BH3883 <i>B. halodurans</i> | IsdG <i>B. halodurans</i> |
|--------------------------------------------|-------------------------|-------------------------|-----------------------|-----------------------|----------------------------|--------------------------|----------------------------------|------------------------------|------------------------------|--------------------------------------------|---------------------------------------|---------------------------|------------------------|-----------------------------|---------------------------|
| HmoA <i>B. subtilis</i>                    |                         | 25.5                    | 33.3                  | 33.6                  | 57.8                       | 33.9                     | 77.9                             | 57.8                         | 43.4                         | 54.4                                       | 30.2                                  | 48.3                      | 33.9                   | 51.8                        | 33.1                      |
| HmoB <i>B. subtilis</i>                    | 42.2                    |                         | 26.1                  | 26.7                  | 23.5                       | 25                       | 23.8                             | 24.6                         | 25.9                         | 23.2                                       | 25.3                                  | 25.6                      | 25.7                   | 24.4                        | 25.1                      |
| ISDG <i>S. aureus</i>                      | 61.1                    | 41.6                    |                       | 64.2                  | 32.3                       | 37.4                     | 32.1                             | 31                           | 30.7                         | 27.8                                       | 32.5                                  | 30.3                      | 33.9                   | 30.4                        | 35.4                      |
| ISDI <i>S. aureus</i>                      | 60.2                    | 41.6                    | 80.6                  |                       | 30.7                       | 34.7                     | 31.4                             | 32.3                         | 27.6                         | 28.3                                       | 30.1                                  | 30                        | 33.3                   | 29.8                        | 33.1                      |
| BA2987 <i>B. anthracis</i>                 | 81.5                    | 43.4                    | 64.8                  | 59.3                  |                            | 33.6                     | 53.9                             | 85.2                         | 50                           | 57                                         | 32.5                                  | 52.6                      | 35.2                   | 54.4                        | 31.8                      |
| IsdG <i>B. anthracis</i>                   | 58.3                    | 38                      | 59.8                  | 55.6                  | 57.4                       |                          | 33.9                             | 33.6                         | 29.7                         | 28.7                                       | 36.4                                  | 30.2                      | 58.8                   | 31.9                        | 65.8                      |
| YetG <i>B. amyloliquefaciens</i>           | 87.6                    | 42.8                    | 61.1                  | 56.6                  | 77                         | 55.8                     |                                  | 54.8                         | 41.3                         | 52.1                                       | 27.6                                  | 45.1                      | 35.2                   | 53                          | 32.1                      |
| Bcer98_2029 <i>B. cereus</i>               | 81.5                    | 41.6                    | 63.9                  | 62                    | 99.1                       | 57.4                     | 77.9                             |                              | 53.1                         | 56                                         | 29.5                                  | 50.8                      | 39.7                   | 58.2                        | 32.3                      |
| BBR47_55400 <i>Brevibacillus brevis</i>    | 71.3                    | 42.8                    | 59.8                  | 55.6                  | 71.3                       | 53.3                     | 69                               | 71.3                         |                              | 44                                         | 30.8                                  | 47.5                      | 34.1                   | 51.8                        | 31                        |
| Bsph_4360 <i>Lysinibacillus sphaericus</i> | 75.9                    | 42.8                    | 63.6                  | 60.2                  | 73.1                       | 56.1                     | 74.3                             | 75                           | 72                           |                                            | 31.3                                  | 49.2                      | 30.7                   | 56.9                        | 28.1                      |
| IsdG <i>Lysinibacillus sphaericus</i>      | 55                      | 40.4                    | 58.6                  | 58.6                  | 53.2                       | 56.8                     | 56.6                             | 55                           | 55.9                         | 53.2                                       |                                       | 30.2                      | 30.5                   | 29.6                        | 33.8                      |
| ABC1946 <i>B. clausii</i>                  | 76.1                    | 45.2                    | 58.4                  | 54.9                  | 75.2                       | 56.6                     | 77                               | 77                           | 69.9                         | 72.6                                       | 51.3                                  |                           | 32.8                   | 63.7                        | 28                        |
| IsdG <i>B. clausii</i>                     | 60.2                    | 42.8                    | 60.7                  | 60.2                  | 63                         | 75.7                     | 59.3                             | 62                           | 61.7                         | 57.9                                       | 56.8                                  | 60.2                      |                        | 39.5                        | 55.7                      |
| BH3883 <i>B. halodurans</i>                | 75.9                    | 43.4                    | 58.9                  | 56.5                  | 73.1                       | 57                       | 73.5                             | 74.1                         | 72                           | 76.9                                       | 52.3                                  | 77.9                      | 62.6                   |                             | 29.2                      |
| IsdG <i>B. halodurans</i>                  | 57.8                    | 39.8                    | 55.2                  | 58.6                  | 58.6                       | 81                       | 56.9                             | 62.1                         | 54.3                         | 57.8                                       | 54.3                                  | 58.6                      | 71.6                   | 56.9                        |                           |

Percentage similarity
