# Supplementary material
Source: PubMed Central journal article supplement (PMC3352277)
Supplement: supp_157.11.3221_mic053579figS1_legend.pdf [file supp_157.11.3221_mic053579figS1_legend.pdf]

***Bacillus subtilis* Fur represses one of two paralogous haem-degrading monooxygenases**

**By:** Ahmed Gaballa and John D. Helmann

**SUPPLEMENTARY FIGURE LEGEND**

**Supplementary Fig. S1.** Percentage similarities (white background) and identities (green background) among putative haem monooxygenases.
